# Supplementary material for: Monocytes undergo multi-step differentiation in mice during oral infection by Toxoplasma gondii
Source: PubMed Central journal article supplement (PMC6920430; doi:10.1038/s42003-019-0718-6), 2019-12-18
Supplement: 42003_2019_718_MOESM1_ESM.pdf [file 42003_2019_718_MOESM1_ESM.pdf]

**A** Gating strategy Cell sorting BM WT (Lin= CD3 CD19 NK1.1 LY6G):

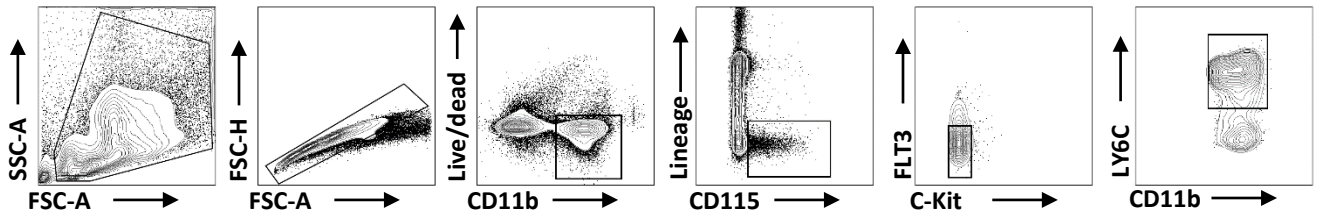

**B** Gating strategy Cell sorting Spleen&SILP WT (Lin= CD3 CD19 NK1.1):

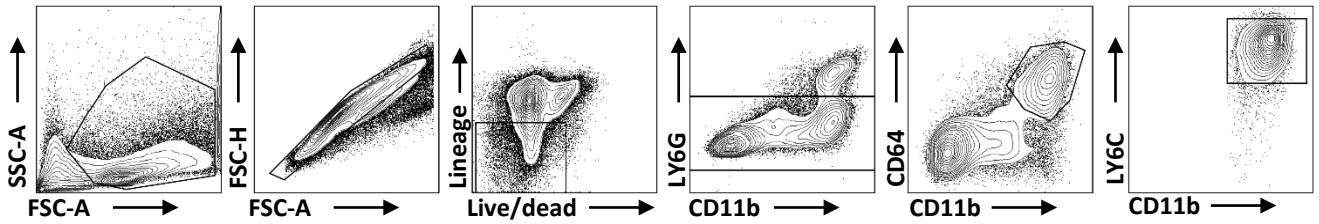

**Spleen**

Cd11b+ LY6C+ cells:

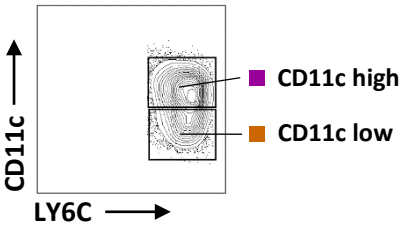

**Supplementary figure 1:** Gating strategy used to sort the Ly6C<sup>+</sup> monocytes from the bone marrow (A), the SILP and the spleen (B).



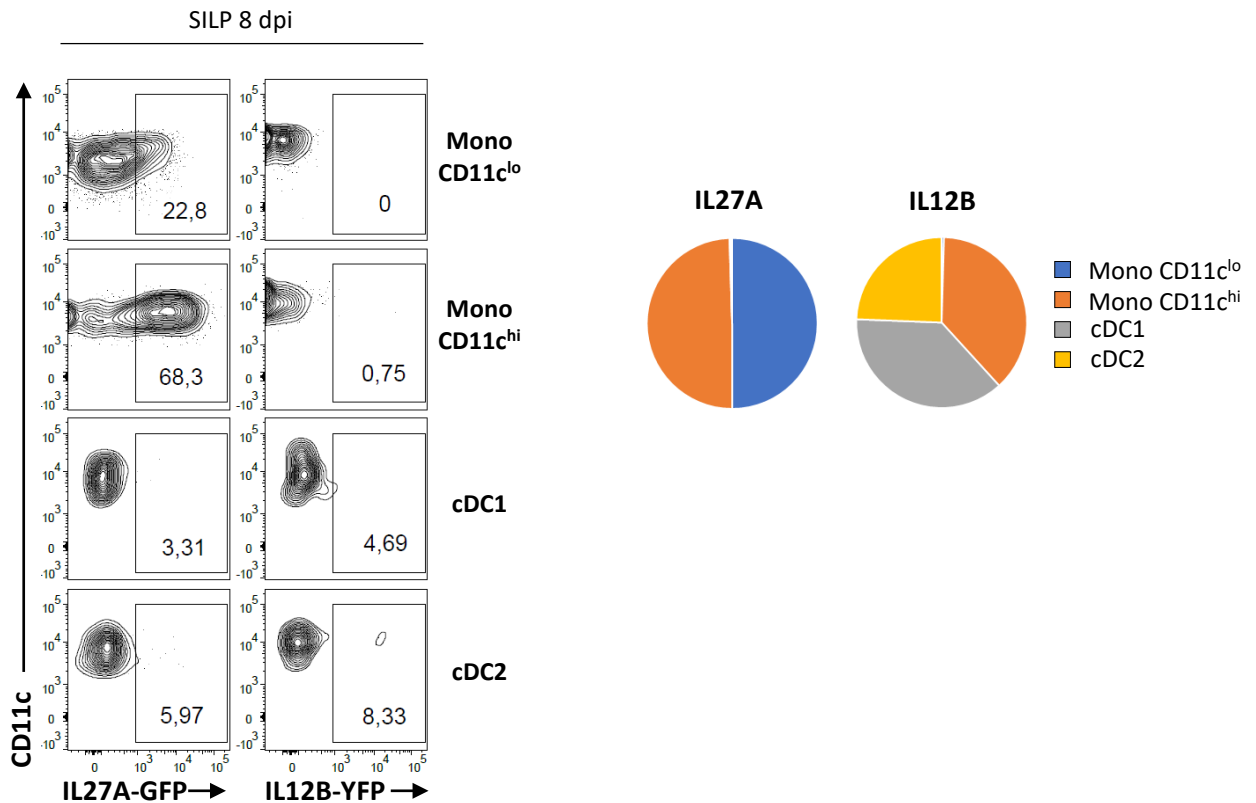

**Supplementary figure 3:** Representative flow cytometric analysis of IL12B-YFP and IL27A-GFP expression by SILP monocytes (CD11c<sup>hi</sup> and <sup>lo</sup>) and conventional DCs defined as Lin<sup>-</sup>MHCII<sup>hi</sup>CD11c<sup>hi</sup>CD64<sup>-</sup>CD11b<sup>low</sup>CD103<sup>+</sup> (cDC1) and Lin<sup>-</sup>MHCII<sup>hi</sup>CD11c<sup>hi</sup>CD64<sup>-</sup>CD11b<sup>+</sup>CD103<sup>low</sup> (cDC2). Numbers represent the frequency of positive cells. Representative of 3 independent experiments (n=4 mice per group). The relative proportion of each population among IL27A-GFP<sup>+</sup> and IL12B-YFP<sup>+</sup> cells in the spleen of infected mice (means from n=4 per group).

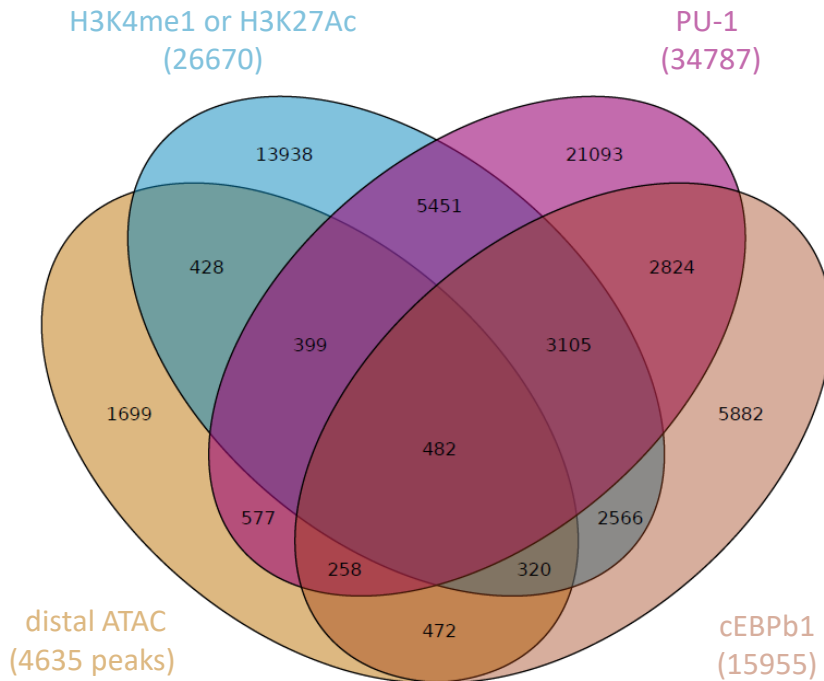

**Supplementary figure 4:** Venn diagram showing the overlap between distal ATAC peaks (more than 2KB away from known TSS) and public ChIP-Seq data from BMDCs for PU-1, cEBPb1 and H3K4me1 or H3K27Ac histone marks (Garber *et al*, Mol Cell 2012). For PU-1 and cEBPb1, we created atlases (with bedtools suit) that contain the peaks identified in BMDCs in unstimulated and 2h LPS conditions. For Histone marks, we generated an atlas with the peaks identified in LPS-stimulated BMDCs. The total number of peaks for each atlas is indicated. Overlap was performed using Intervene tool (Khan, A. & Mathelier, A. Intervene: a tool for intersection and visualization of multiple gene or genomic region sets. BMC Bioinform. 18, 287 (2017)).

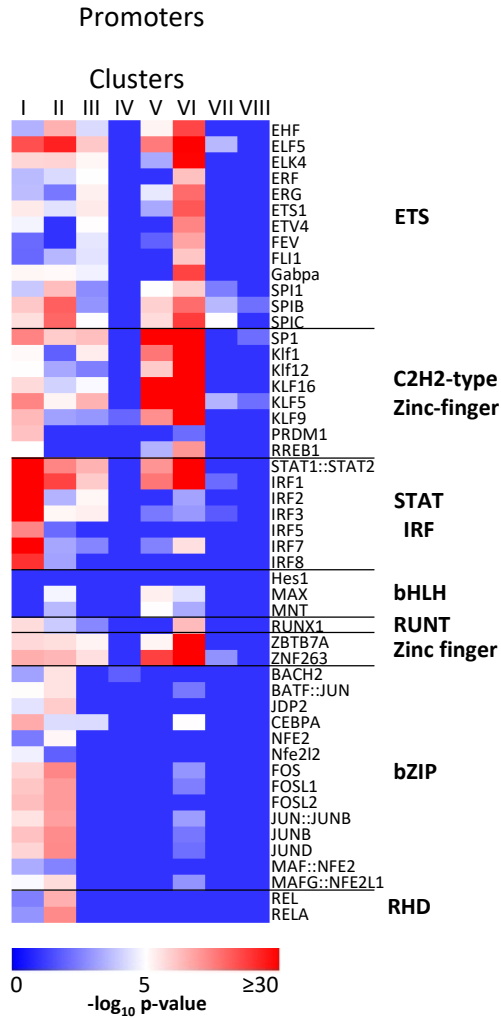

**Supplementary figure 5:** Motif enrichment analysis for clusters I to VIII at the centers of ATAC peaks located in proximal promoter regions (within 2KB of a TSS) using AME and presented as  $-\log_{10}$  of p values. Transcription factors families are shown in the right margin.

**Supplementary Figure 6: TNF $\alpha$  signaling does not play a major role in the induction of the second wave of epigenetic remodeling in the periphery**

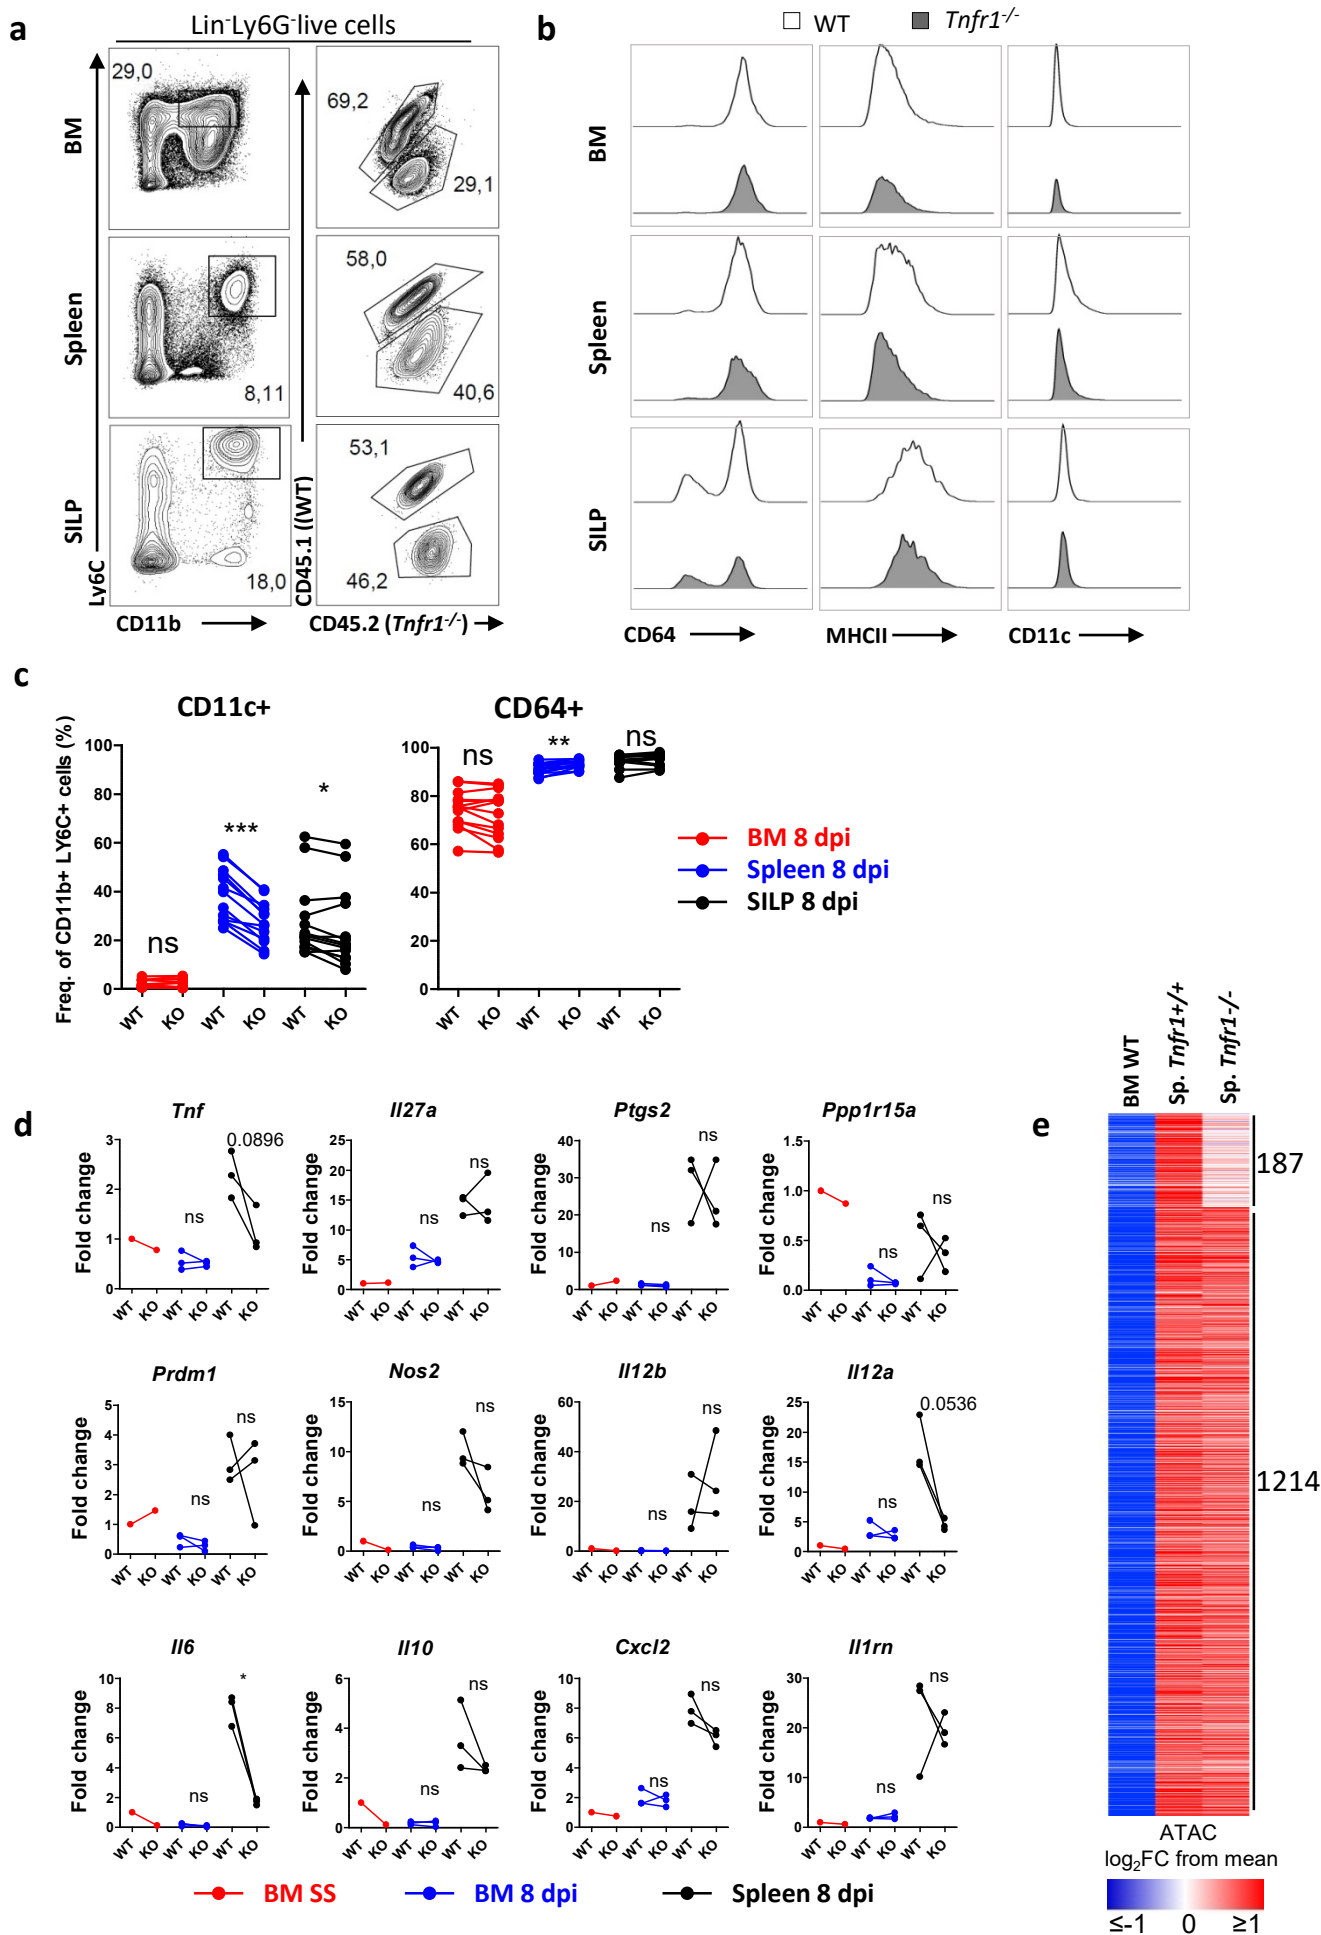

**Legend to Supplementary Figure 6:** WT/*Tnfr1*<sup>-/-</sup> mixed bone marrow chimeras were infected per-orally with *T. gondii* cysts. (a) Flow cytometric analysis of CD11b<sup>+</sup>Ly6C<sup>+</sup> monocytes from BM, spleen and SILP, of naive (SS) and infected mice (8 dpi). (b) Representative histograms showing expression levels of surface markers and activation markers by CD11b<sup>+</sup>Ly6C<sup>+</sup> monocytes from BM, spleen, and SILP of infected mice (8 dpi). (c) Frequency of WT and *Tnfr1*<sup>-/-</sup> CD11b<sup>+</sup>Ly6C<sup>+</sup> monocytes expressing CD64 and CD11c in these organs (each point represents a single mouse, n = 14 mice from two independent experiments). Statistics were calculated using Wilcoxon test. \* P < 0.05, \*\* P < 0.01, \*\*\* P < 0.001. (d) Histograms showing relative expression level of selected genes by wild-type and *Tnfr1*<sup>-/-</sup> monocytes from BM and spleen of naïve and infected mice, as assessed by qPCR. The relative expression (fold change) is normalized to the BM of naïve mice (each point represents a pool of 3 mice). Statistics were calculated using Wilcoxon test. \* P < 0.05, \*\* P < 0.01. (e) Heatmap showing, among distal regulatory regions from cluster II (as defined in Fig 4), which regions were more or less accessible in CD45.1 wild-type and CD45.2 *Tnfr1*<sup>-/-</sup> monocytes from the BM and the spleen of infected mice. Out of these 1401 regions, 187 were found to be less accessible in *Tnfr1*<sup>-/-</sup> cells as compared to their WT counterparts. Values are represented as Log<sub>2</sub> fold-change obtained from the median of each single region.

**Supplementary Table 1: List of primers and probes used for single-cell qPCR analysis.**

| Gene symbol     | 5'FAMTAMRA3' probe             | Forward primer 5'3'        | Reverse primer 5'3'      |
|-----------------|--------------------------------|----------------------------|--------------------------|
| <i>Arg1</i>     | TGGTCTCCACCAGCACCA             | GGCAGAGGTCCAGAAAGT         | ATGCTTCCAACCTGCCAGACT    |
| <i>Bach2</i>    | CCCTGGCCGTGACCTCTCA            | CACTGGTTGGACAGACGAAA       | AACTGTAGCAGTGGCCCAA      |
| <i>Batf</i>     | AAAGCCGACACCTTCACTGGA          | CCAGAAGACCCGACAGAGAC       | TTCTGTTTCCAGTCTCTCAC     |
| <i>Batf3</i>    | AGTGTGCTACCTGAGCGAGG           | GAGATTTCCGAAAGCTGAGGA      | TTCATAGGACACAGCAGCAG     |
| <i>Bcl6</i>     | CCGCTACAAGGGCAACTCGC           | CGCACAGTGACAAACCATAACA     | ACCCGTGTGGACAGTCTTGT     |
| <i>Ccl2</i>     | CTCAGCCAGATGCAGTTAACGCCCC      | CTTCTGGCCCTGCTGTCA         | CCAGCCTACTCATTGGGATCA    |
| <i>Ccl3</i>     | CCCGACTGCCTGCTGCTTCTC          | AAGTCTTCTCAGCGCCATATG      | GTGGAACTTCCGGCTGTAG      |
| <i>Cebpb</i>    | AACTGTACCGGGCCCTGA             | GTGTGGACACGGGACTGAC        | CCCGCAGGAACATCTTTAAG     |
| <i>Cxcl1</i>    | AAGGCAAGCCTCGCACCAT            | CCGAAGTCATAGCCACACTC       | TTTCTGAACCAAGGAGCTT      |
| <i>Cxcl10</i>   | TCTCGCAAGGACGGTCCGCTG          | GCCGTCAATTTCTGCCTCAT       | GCTTCCATATGGCCCTCATT     |
| <i>Cxcl11</i>   | CCGATGCAAGACAGCGGCC            | GATGAACAGGAAAGTCAAGC       | GCTTCTCGATCTCTGCCATT     |
| <i>Cxcl2</i>    | CCCCTCGCGCCAGACAGAA            | ACATCCAGAGCTTGAGTGTGA      | GCCCTTGAGAGTGGCTATG      |
| <i>Cxcl9</i>    | CATCAGCACACCGGAGGACG           | GAAACCTTAGTGATAAGGAATGCA   | CTGTTTAGGCTTTGAGGGATT    |
| <i>Cxcr3</i>    | CCCTGGCCTCTGCAAGTGGCA          | GCTGCTGTCAGTGGGTTTT        | GTTGATGTTGAACAAGGGCG     |
| <i>Ddit3</i>    | CTGCCATGACTGCACGTGGACC         | CCACACCTGAAAGCAGAAACC      | ACCGTCTCCAAGGTGAAAGG     |
| <i>Dnajb9</i>   | CCGAGAGTGTTCATACGCTTCTGCA      | TGCTGAAGCAAAATTCAGAGA      | TCCAATTTGTGCATACTCTTCC   |
| <i>Ebi3</i>     | TCCAGGCTCCAACTCCACA            | GCCATGCTTCTCGGTATCC        | GCCAGTGAAGTGGCAATGA      |
| <i>Eomes</i>    | TCGCTGTGACGGCCTACAAAACA        | CCTTACCTTCTCAGAGACACAGTT   | TCGATCTTTAGCTGGGTGATATCC |
| <i>Ern1</i>     | ACCATCCCAAGATTTGGTTCAGGCC      | ACGAAGGCCTGACGAAACT        | TTTACCATGTAGAGGATTCCA    |
| <i>Gata3</i>    | AGCGAAGGCTGTGGCAGCA            | GCCTGGGACTCTACCATAA        | GCAGGATGTCCCTGCTCTC      |
| <i>Hes1</i>     | CTCCTCGCTCACTTCGGACTCCATGT     | GGTCTAACCGAGTGTCACTT       | CAGTGGCCTGAGGCTCTCA      |
| <i>Hmox1</i>    | AGAACCTTTCAGAAAGGTCAAGTGTCCA   | GCCGAGAATGCTGAGTTTAT       | AGGAAGCCATCAACAGCTTA     |
| <i>Icam1</i>    | TGTCTCCGAGGCCAGGAGCC           | AGGGCTGGCATTGTTCTTAA       | GATGGTAGTGGAAAGATCGAA    |
| <i>Id2</i>      | CGCCGCTGACCACCCTGAAC           | CAGAGACTGGACAGAAACCA       | AATTCAGATGCTGCAAGGA      |
| <i>Ido1</i>     | CCCAATGGGCCATGACATACG          | GTCCTGGCAAATGGAAGAA        | CCCACAGGAAATGAGAACA      |
| <i>Ifit2</i>    | CACCTGGAGAGCAATCTGCAGACG       | CACAGCAGACAGTTACACAGCA     | TGCTATGAGTCTCAGGTGA      |
| <i>Ifnb1</i>    | TGCTTTGCCATCCAAGAGATGC         | TGACGGAGAAGATGCAAGAG       | TCCAGGAGACGTACAACAATAGTC |
| <i>Ifng</i>     | TTTGAGGTCAACAACCACAGGTCCA      | GGATGCATTATGAGTATTGC       | GCTTCTGAGGCTGGATTCC      |
| <i>Il10</i>     | TGATGACAGCGCCTCAGCC            | TGGGTGAGAAGCTGAAGACC       | GCTCCACTGCTTGTCTTAA      |
| <i>Il12a</i>    | TGCATGGTGAAGACGGCCAGA          | CTTAGCCAGTCCGAAACCT        | TTGGTCCCGTGTGATGTCT      |
| <i>Il12b</i>    | CCCGCCCAAGAACTTGCAGATG         | TCAGGGACATCATCAAAACCA      | AGGGTACTCCCAAGCTGACT     |
| <i>Il23a</i>    | CCACAAGGACTCAAGGACAACAGCC      | CCCGTATCCAGTGTGAAGATG      | CCCTTTGAAGATGTGAGAGTCA   |
| <i>Il27a</i>    | TTCCAATGTTCCCTGACTTTCCA        | ATCTCGATTGCCAGGAGTGA       | GTGGTAGCGGGAAGCAGAGT     |
| <i>Il27ra</i>   | AAACTTCTGGCAAACGGGCGAGC        | CCTTCCAGACGCCATTCTTA       | GGGTCTTCCAGACAAGCA       |
| <i>Il6</i>      | CAGAATTTGCCATTCGACAACTCTTTCTCA | GAGGATACCATTCCCAACAGACC    | AAGTGCATCATCTGTTGTTATACA |
| <i>Irf1</i>     | TCCGAAGCCGCAACAGACGA           | TCGTCAGCAGAGTCTCTCT        | TTGGCTTCTTCCCTTCTCT      |
| <i>Irf2</i>     | TCCACGTCCCATCCGTGCC            | TGGCTGAACAAGGAGAAGAAG      | GAAGACGGGAGCATCTTTT      |
| <i>Irf3</i>     | CCACAAGGACAAGGACGGAGCC         | AGCTGCTTCCAGACAGTGG        | TTCCATGAAGGCAATCAGATTC   |
| <i>Irf4</i>     | CTGCCGGCTGCATATCTGCCTGT        | GAAGCCTTGGCGCTCTCA         | TCACGAGGATGTCCCGGTAA     |
| <i>Irf5</i>     | TCTACGAGGTCTGCTCCAACGGC        | ATGCCACCTCAGCCGTACA        | CATCAGTGGGTTGGCTCTCT     |
| <i>Irf7</i>     | TCCAAGCTCCCGCTAAGTTCG          | CCAGTTGATCCGCATAAGGT       | TGTGTGGGAGAGCATTG        |
| <i>Irf8</i>     | TTTACGCCACCCAGAGCCGC           | GTGGTGCAGGTCTTTGACAC       | CAGGACCCCTGCTGCTC        |
| <i>Itgax</i>    | CCTAGCACACGGTCTCCCTGATGCA      | CTGGACTTTGTTAAAGCTGTGATGAG | GACGTGGAGATGAAGTGTGTGAAA |
| <i>Kdm6b</i>    | CTGGCGGCGTGAACCTTT             | AATACCCTGCATGGAGATGC       | TGGATATGATGAGGCATCG      |
| <i>Klf4</i>     | TTCCATCCACAGCCCTCCA            | CCCACACAGGTGAGAAACCT       | ACCGTAGTGCCTGGTCACT      |
| <i>Kmt2a</i>    | AAGAACTGCTATCTCTCCGCTGC        | GCAGTGTGGGGAGAGC           | TGACTTCTCATCTGAGCCAAA    |
| <i>Lcn2</i>     | TGACCAGCATTGCCTGCCAGGCCCA      | GACTTCCGGAGCGATCAGT        | ACATCGTAAAGCTGCCCTCTG    |
| <i>Mab21l3</i>  | TCATCACCCACCCACCTGTC           | GCAGCTGAAGGAGGATGTGT       | CAAGTCCAGAAGAGCAGCGT     |
| <i>Maf</i>      | AACCTGGCCACAATCAAGCTACATCA     | CAGAATGAACATAAGCCACTCC     | CACAAGTCAACCCAGAAGG      |
| <i>Map3k11</i>  | CTGCAGCCATCGAGGGTGA            | TGCCTGTGATACACCAGAC        | GGGTCTTGTGTTCCATGTCTG    |
| <i>Map3k5</i>   | CCCTGGGTTTCTGTGTGCCA           | CTCAAGTCCAGCCCATAGA        | TCAGAATCTCCGTTGGTCTG     |
| <i>Nfil3</i>    | CCCTCAGGACCAAGGGAGCA           | GTTACAGCCGCCCTTTCTTT       | CAGGAGCCTTTCATGGGTTA     |
| <i>Nos2</i>     | CGGGCAGCCTGTGAGACCTTGA         | CAGCTGGGCTGTACAACTT        | CATTGGAAGTGAAGCTTTTCG    |
| <i>Nr4a1</i>    | TTGACGCCCTCACAGGTGCG           | CAATGCTTCTGTGTCAGCACT      | TACTGTGCTTGAAGAAAGC      |
| <i>Ppp1r15a</i> | CGCCACAACCTTCTCTCTGTCC         | GCTTTTGGCAACCAGAACC        | GACTGAGCAAGCCCATCAGT     |
| <i>Prdm1</i>    | TGCCAGGCTGCCACAAGAGATTAGCA     | ACACAGGAGAGAAGCCACATGA     | GGTGGGCTTGTGAGATTGCTGT   |
| <i>Ptgs2</i>    | CCCCACAGTCAAAGACTCAGG          | CAGGTCAATGGTGGAGAGGT       | CTGCAGGTTCTCAGGGATGT     |
| <i>Runx1</i>    | CTCTTGCTTACCGCTCCGCTC          | GTAGCGAGATTCACAGACCTC      | GACGGTGTGTTGAGAGTGA      |
| <i>Runx3</i>    | CGTGAACTCTTCCCTCGCCCA          | CAGGTTCAACGACCTTCGAT       | CACTTGGGTAGGGTGTGTA      |
| <i>S100a6</i>   | CGCTTCTGCTGACCGCTGC            | CCCTCGACCACTCCTTTG         | TGACTGACTGGGCTAGAAGAA    |
| <i>Scd1</i>     | CGAAACACCCGGCTGTCAA            | TTCTTCTCTCAGTGGGTTG        | CGGGCTTGTAGTACCTCTC      |
| <i>Setd1a</i>   | CAGGACTCTGCTACTCCAGCAGA        | CTCAGTCTCCCAAGGAACC        | GGGTTTGAAGGAGTTGAAGT     |
| <i>Smyd2</i>    | ACAACCATGGAGGAGCAATTCAGCT      | CGTGGAAATGTCAGAAGGAAGA     | GCACAGTCTCCGAAGGATTC     |
| <i>Spi1</i>     | TTCTCCATCGCTGCCACGA            | ATACCAACGTTCAATGCATG       | GTGCGGAGAAATCCCAGTAG     |
| <i>Spib</i>     | AGGCCCTTGTGGCTGGCTCC           | CTCGGACAGTGAGTCAAGCG       | GTACAGGCGCAGCTTCTG       |
| <i>Tbx21</i>    | TCATCACTAAGCAAGGACGGCGA        | CAAGTTCAACCAGCACCAGA       | CCACATCCACAAACATCTCT     |
| <i>Tcf4</i>     | TGCAAAGCCGAATCGAAGACCG         | GCTGCTCATCTCCAAATTA        | GAATCCAGTCTGCTCAAGCTT    |
| <i>Tgfb1</i>    | CCGAAGCGGACTACTATGCTA          | TTTCTCATAGATGGCGTTGTTG     | CGCGTGCTAATGGTGGACCG     |
| <i>Tlr3</i>     | CCGGGTTGTTCCAGACAATTGGC        | CGAAAGTTGGACTGTGATCAA      | TTCAAGAGGAGGGCGAATAA     |
| <i>Tlr9</i>     | CACAGAGCGCAGTTGCCGACT          | GCCCAAACTCTCCCTTATGAT      | ACCCGACGCTCGTTATACAC     |
| <i>Tnf</i>      | TCGAGTGACAAGCCTGTAGCCCA        | CAGACCTCACACTCAGATCA       | CAGTGGGTTGTTGCTACGA      |
| <i>Tnfrsf18</i> | TGCCAAACAGGCCAGAGGG            | GCAAGATCTGCAAGCACTACC      | CGGAAGCCAAACAAATATCC     |
| <i>Tsc22d3</i>  | CAAGATTGAGCAGGCCATGGACCTC      | CAGTGTGGTGGCCCTAGAC        | CAGCGTACATCAGGTGGTTC     |
| <i>Usp18</i>    | ATGGGAACCAAGATACCCTGGC         | CCTGGAAGGATGTCCAGTGT       | TCGTGTAACCAAGAGATAGGC    |
| <i>Vegfa</i>    | CACCATGCAGATCATGCGGATCAAAC     | GCTGTGCAAGGCTGCTGTAAC      | AGCTCATCTCTATGTGCTG      |
| <i>Xbp1</i>     | CTGAGTCCGACGAGGTGCA            | GGAGTGGAGTAAGGCTGGTG       | GGCAACAGTGTGAGAGTCCA     |
| <i>Zbtb20</i>   | CCGAGCGCATTCACAGCATCA          | ACACCCGGTCTATCTGATTGT      | AGCACGGAAATGCTGAAGTT     |
| <i>Zfp36</i>    | CCAAGTGCCAGTTTGTCTCACGGC       | CTCAGAAAGCGGGCTGTGT        | GATTGGCTTGGCGAAGTTC      |
| <i>Zmynd11</i>  | TCTAATGCTCCTGCAAACTGGGCA       | GAGTTCAGGCTTAGAGACAGCAG    | TCAAGTAGTGGCCATTTCC      |



| Samples                           | # reads  |
|-----------------------------------|----------|
| ATAC Mono BM SteadyState rep1     | 20972376 |
| ATAC Mono BM SteadyState rep2     | 90529134 |
| ATAC Mono Spleen SteadyState rep1 | 16892826 |
| ATAC Mono Spleen SteadyState rep2 | 22387344 |
| ATAC Mono BM Toxo rep1            | 23277502 |
| ATAC Mono WT BM Toxo rep2         | 23083388 |
| ATAC Mono Spleen Toxo rep1        | 22802296 |
| ATAC Mono WT Spleen Toxo rep2     | 21312520 |
| ATAC MonoHigh Spleen Toxo         | 14679516 |
| ATAC MonoLow Spleen Toxo          | 13997642 |
| ATAC Mono LP Toxo rep1            | 18967388 |
| ATAC Mono LP Toxo rep2            | 72264194 |
| ATAC Mono STAT1-KO BM Toxo        | 23270646 |
| ATAC Mono STAT1-KO Spleen Toxo    | 26205626 |

**Supplementary Table 2:** List of ATAC-seq samples.

| <b>BMDCs</b> | <b># peaks</b> |               |
|--------------|----------------|---------------|
|              | <b>Resting</b> | <b>LPS 2h</b> |
| STAT1        | 254            | 4985          |
| IRF1         | 1747           | 10419         |
| PU-1         | 29988          | 27406         |
| JUNB         | 6323           | 9485          |
| RELA         | 385            | 13179         |
| CEBPb        | 6261           | 15261         |

| <b>BMMs</b> | <b># peaks</b> |                                  |
|-------------|----------------|----------------------------------|
|             | <b>Resting</b> | <b>IFN<math>\gamma</math> 3h</b> |
| IRF8        | 6230           | 5741                             |
| IRF1        | 2338           | 14196                            |

**Supplementary Table 3:** Number of ChIP-seq peaks of resting or LPS-stimulated BMDCs (GSE36099) and IFN $\gamma$ -stimulated BMMs (GSE77886) for the indicated transcription factors.
